# Supplementary material for: Genetics of Aggression in Alzheimer’s Disease (AD)
Source: PubMed Central journal article supplement (PMC5385328; doi:10.3389/fnagi.2017.00087), 2017-04-10
Supplement: Table_1.pdf [file Table_1.pdf]

## Supplementary Table S1

|      | 1    | 2     | 3     | 4     | 5    | 6    | 7    | 8    | 9    | 10   | 11   | 12   | $\Sigma$ sum | x mean |
|------|------|-------|-------|-------|------|------|------|------|------|------|------|------|--------------|--------|
| AR   | -1.2 | -2    | -3    | -0.9  | -0.3 | -2.4 | 0.4  | -1.8 | -1.5 | -3.2 | 0    | -2.6 | -18.5        | -1.5   |
| BDNF | -1.8 | -1    | -0.05 | -2.8  | -3.3 | -2.3 | 0.66 | -0.5 | -1.5 | -3.1 | -3.6 | -0.6 | -19.89       | -1.7   |
| COMT | -0.9 | 0.9   | 3     | 3.9   | 5.9  | 2.35 | 6.3  | 4.5  | 0.18 | 8.3  | -1.8 | 1.4  | 34.03        | 2.9    |
| DBH  | -3.5 | -4.3  | -2.7  | -2    | -0.3 | 0.55 | -4.7 | 1.5  | -2.2 | -3   | -1.5 | -5.4 | -27.55       | -2.3   |
| NOS1 | 1.8  | 2.2   | 0.3   | -0.45 | 7.8  | 1.3  | 3.2  | 4.6  | -2.3 | 4    | 5.2  | 6.4  | 34.05        | 2.8    |
| TPH1 | -0.4 | -0.05 | -1.1  | 1     | -1.6 | 1.45 | 0.7  | 0.6  | -2.3 | -2   | 2.1  | 1.8  | 0.2          | 0.02   |

**Table S1** – data for 12 individual AD cases in relation to their own controls are numbered in the top row; genes of interest and common to both AD and aggression are in the left-most column; other genes may certainly be involved but were not studied in the current analysis;  $\Sigma$ sum is the arithmetic sum of all 12 data points; x mean is the mean of all 12 data points; all data points were significant relative to their individual controls ( $p < 0.05$ , ANOVA); a positive value indicates up-regulation; a negative value indicates down-regulation; data derived in part using Silicon Genetics algorithms (Agilent Technologies, Redwood City CA, USA).
